## An epidemiological study of season of birth, mental health, and neuroimaging in the UK Biobank

Maria Viejo-Romero<sup>1</sup>, Heather C. Whalley<sup>1</sup>, Xueyi Shen<sup>1</sup>, Aleks Stolicyn<sup>1</sup>, Laura de Nooij<sup>1</sup>, Daniel J. Smith<sup>1</sup>, David M. Howard<sup>1,2\*</sup>

### Affiliations:

1 Division of Psychiatry, Centre for Clinical Brain Sciences, University of Edinburgh, Royal Edinburgh Hospital, Edinburgh, UK

2 Social, Genetic and Developmental Psychiatry Centre, Institute of Psychiatry, Psychology & Neuroscience, King's College London, UK

\* Corresponding author: David M. Howard  
Social, Genetic and Developmental Psychiatry Centre,  
Institute of Psychiatry, Psychology & Neuroscience,  
King's College London, UK  
+44 (0)20 7848 5433  
E-mail: David.Howard@kcl.ac.uk

## Abstract

Environmental exposures during the perinatal period are known to have a long-term effect on adult physical and mental health. One such influential environmental exposure is the time of year of birth which affects the amount of daylight, nutrients, and viral load that an individual is exposed to in the key developmental period. Here we investigate associations between season of birth (seasonality), four mental health traits ( $n=135,541$ ) and multi-modal neuroimaging measures ( $n=33,815$ ) within the UK Biobank. Summer births were associated with probable recurrent Major Depressive Disorder ( $\beta=0.024$ ,  $p_{corr}=0.048$ ), greater mean cortical thickness in temporal and occipital lobes and in the middle temporal, fusiform, superior temporal, and lingual gyri regions ( $\beta$  range=0.013 - 0.020,  $p_{corr}<0.05$ ). Winter births were associated with greater white matter integrity globally, in the association fibers, thalamic radiations, and six individual tracts ( $\beta$  range=-0.010 to -0.021,  $p_{corr}<0.05$ ). Results of sensitivity analyses that adjusted for birth weight were similar, with additional associations found between winter birth and frontal, occipital and cingulate lobe surface areas, as

well as fractional anisotropy in the forceps minor. Sensitivity analyses also revealed an additional association between summer birth and greater cingulate thickness. Overall, results suggest that seasonality affects brain structure in later life and may have a role in lifetime recurrent Major Depressive Disorder. The small effect sizes observed here warrant further research to validate the results in the context of different latitudes and co-examine genetic and epigenetic measures to potentially reveal informative biological pathways.

**Key words:** Seasonality, season of birth, birth month, UK Biobank, neuroimaging, mental health

## Introduction

Season of birth has long been hypothesised to have enduring effects on human health [1]. The relatively recent “Foetal Origins of Adult Disease” hypothesis proposes that intra-uterine exposures influence later adult health, including mental health outcomes [2, 3]. Seasonality of birth has been associated with multiple diseases [4], including psychiatric [5-7], neurodevelopmental [8], cardiovascular [9], inflammatory [10], and genetic [11]. The mechanisms by which seasonality may affect risk to these disorders are hypothesised to include interactions with photoperiod and sunlight [12], nutrition [13], risk of pre-term birth and early life infection [14], and maternal vitamin D deficiency [15]. These interactions could also be mediated by genetic [16], epigenetic [17] or environmental changes [5] *in utero* or perinatally.

Perinatal photoperiod directly affects the physiology, brain morphology and behaviour of many animals via transplacental signalling to melatonin receptors in the developing medio-basal hypothalamus [18, 19]. Many of these season-of-birth effects endure into adulthood, including altered circadian timing [20], changes in affective behaviour, hippocampal volume [21] and changes to serotonergic and dopaminergic systems in the brain [22]. The wider effects of season of birth on human brain structure have been investigated using magnetic resonance imaging with winter births associated with increased grey matter volume of the superior temporal gyrus in a study of over 550

individuals [23]. However, in a larger study of 13,000 Rotterdam Study participants there was no effect of season of birth on any imaging derived measures [24].

Differences in photoperiod exposure during the perinatal and postweaning time windows have been associated with enduring changes in anxiety and depressive-like behaviours in developmentally stable adulthood periods within animal models [25, 26], with shorter photoperiods associated with increased presence and severity of these behaviours. Differences in brain morphology have been associated with mental health disorders including depression [27-29], externalizing behaviour [30] and schizophrenia [31, 32]. The associations between brain morphology and mental health thus warrant an investigation of associations of seasonality with both brain morphology and mental health.

Birth seasonality likely plays a multifaceted role in the aetiology of adult mental health, either alongside or independently of seasonality-induced brain morphology changes. However, to date, the potential relationship between seasonality of birth, mental health traits and imaging measures has not been examined at scale. This study, therefore, aims to individually explore associations between seasonality of birth and (a) mental health disorders, and (b) brain imaging measures within the UK Biobank.

## **Materials & Methods**

### **UK Biobank**

The UK Biobank (UKB) is a well-characterised community cohort of over 500,000 participants aged 37-73 years at recruitment (2006-2010) [33]. All participants were invited to an initial assessment in which baseline data were collected, including month of birth, birth weight, and birth location.

Mental health information was collected for all individuals at baseline using a Touchscreen Questionnaire, and for 157,348 participants between 2016 and 2017 using a Mental Health Questionnaire [34] (MHQ). A subset of the cohort ( $n=42,709$ ) was invited to the first imaging visit in 2014 where brain scans, including T1-weighted (T1) and diffusion tensor imaging (DTI), were

obtained. Data were accessed under the UKB Application Number 4844. UKB has approval from the NHS National Research Ethics Service as a research tissue bank (References 16/NW/0274 and 11/NW/0382).

## Seasonality

Seasonality of birth was examined as a quantitative phenotypic trait ( $y$ ) capturing the month of birth (UKB data-field 52) following the approach of Howard et al. (35). The birth month of each participant ( $i$ ) was transformed via a cos function, with the lowest phenotypic score (-1) corresponding to those born in December and the highest phenotypic score corresponding to those born in June (+1), as below:

$$y_i = -1 \times \cos \left( 2\pi \left( \frac{\text{Month of Birth}_i}{12} \right) \right)$$

## Mental health traits

Four mental health trait phenotypes were obtained from responses to the Touchscreen Questionnaire and the “Thoughts and Feelings” section of the MHQ. Where participants had completed both questionnaires ( $n=85,266$ ), the MHQ responses were used to generate phenotypes due to the greater specificity of this questionnaire (see S2.2.1A and S2.2.1B Methods for UKB data-fields used). Participants who had answered “Prefer not to answer” or “I don’t know” to any questions or with insufficient symptom data (i.e., only one reported symptom) were removed at this stage. The remaining participants ( $n=170,982$ ) were categorised into four mental health-related phenotypes: probable recurrent Major Depressive Disorder (P-RMDD) ( $n=39,528$  cases), probable single episode Major Depressive Disorder (P-SEMDD) ( $n=16,430$  cases), probable Hypomania ( $n=9,104$  cases) and probable Mania ( $n=2,569$  cases), plus a control group ( $n=103,351$ ) as previously validated by Smith et al. (36) (see S2.2.1C and S2.2.1D Methods for grouping specification). At this point, participants who were of non-white ethnicity ( $n=9,581$ ), did not report a UK or Republic of Ireland birthplace or had unrecoverable geographical birthplace co-ordinate data ( $n=9,897$ ) (See S2.1

Methods for geographical data processing), had missing Townsend Deprivation Index values ( $n=189$ ), or had chosen to withdraw from further studies ( $n=8$ ) were excluded. Furthermore, participants who reported other neuropsychiatric or sleep-related conditions ( $n=28$ ), brain cancer diagnoses ( $n=2$ ), or reported having done shift work ( $n=13,241$ ) were also excluded. This resulted in a total of 32,946 exclusions with 138,036 participants remaining (see S2.3.1A Methods for exclusion details).

Any overlaps between the groupings were removed to create distinct phenotypes that did not share a probable diagnosis: P-RMDD ( $n=31,652$ ), P-SEMDD ( $n=13,529$ ), probable Unipolar Mania (P-UM) ( $n=1,202$ ) and probable Bipolar Depression (P-BD) ( $n=5,140$ ) (see S2.2.1D Methods for overlaps permitted). Both the P-RMDD and the P-SEMDD groups exclude participants within the probable Mania or probable Hypomania groups. P-UM excludes participants within either depression group, whereas the P-BD grouping allows for participants also within either depression grouping and follows the definitions used in Sangha et al. (37). Participants who completed the MHQ lead questions for mania (UKB data-fields 20501 and 20502) and depression (UKB data-fields 20446, 20441), and/or the Touchscreen Questionnaire lead questions for mania (UKB data-fields 4642, 4653) and depression (UKB data-fields 4598, 4631) but had not been classified into one of the four phenotypes, were defined as controls ( $n=84,018$ ). The total sample size was therefore 135,541 (see S2.3.1B Methods for group sample sizes). Participant demographics for the mental health phenotypes are provided in Table 1.

|                               | Control<br>(N=84018) | Probable Major<br>Depressive<br>Disorder<br>(n=13529) | Probable Single<br>Episode<br>Depression<br>(n=31652) | Probable<br>Unipolar<br>Mania<br>(n=1202) | Probable<br>Bipolar<br>Depression<br>(n=5140) | Total<br>(n=135541) |
|-------------------------------|----------------------|-------------------------------------------------------|-------------------------------------------------------|-------------------------------------------|-----------------------------------------------|---------------------|
| <b>Sex</b>                    |                      |                                                       |                                                       |                                           |                                               |                     |
| Female                        | 39245 (46.7%)        | 9306 (68.8%)                                          | 21329 (67.4%)                                         | 460 (38.3%)                               | 3039 (59.1%)                                  | 73379 (54.1%)       |
| Male                          | 44773 (53.3%)        | 4223 (31.2%)                                          | 10323 (32.6%)                                         | 742 (61.7%)                               | 2101 (40.9%)                                  | 62162 (45.9%)       |
| <b>Age (years)</b>            |                      |                                                       |                                                       |                                           |                                               |                     |
| Mean (SD)                     | 62.8 (8.32)          | 61.5 (8.09)                                           | 60.3 (8.28)                                           | 61.2 (8.42)                               | 59.8 (7.81)                                   | 62.0 (8.35)         |
| <b>Ethnicity</b>              |                      |                                                       |                                                       |                                           |                                               |                     |
| White                         | 62 (0.1%)            | 7 (0.1%)                                              | 29 (0.1%)                                             | 2 (0.2%)                                  | 8 (0.2%)                                      | 108 (0.1%)          |
| British                       | 81900 (97.5%)        | 13129 (97.0%)                                         | 30522 (96.4%)                                         | 1152 (95.8%)                              | 4908 (95.5%)                                  | 131611 (97.1%)      |
| Irish                         | 1222 (1.5%)          | 225 (1.7%)                                            | 591 (1.9%)                                            | 23 (1.9%)                                 | 131 (2.5%)                                    | 2192 (1.6%)         |
| Any other white<br>background | 834 (1.0%)           | 168 (1.2%)                                            | 510 (1.6%)                                            | 25 (2.1%)                                 | 93 (1.8%)                                     | 1630 (1.2%)         |
| <b>Month of Birth</b>         |                      |                                                       |                                                       |                                           |                                               |                     |
| January                       | 6894 (8.2%)          | 1140 (8.4%)                                           | 2666 (8.4%)                                           | 108 (9.0%)                                | 443 (8.6%)                                    | 11251 (8.3%)        |
| February                      | 6686 (8.0%)          | 1079 (8.0%)                                           | 2474 (7.8%)                                           | 93 (7.7%)                                 | 380 (7.4%)                                    | 10712 (7.9%)        |
| March                         | 7655 (9.1%)          | 1241 (9.2%)                                           | 2928 (9.3%)                                           | 109 (9.1%)                                | 449 (8.7%)                                    | 12382 (9.1%)        |
| April                         | 7264 (8.6%)          | 1172 (8.7%)                                           | 2794 (8.8%)                                           | 123 (10.2%)                               | 429 (8.3%)                                    | 11782 (8.7%)        |
| May                           | 7572 (9.0%)          | 1209 (8.9%)                                           | 2915 (9.2%)                                           | 99 (8.2%)                                 | 457 (8.9%)                                    | 12252 (9.0%)        |
| June                          | 6952 (8.3%)          | 1135 (8.4%)                                           | 2787 (8.8%)                                           | 111 (9.2%)                                | 447 (8.7%)                                    | 11432 (8.4%)        |
| July                          | 7161 (8.5%)          | 1143 (8.4%)                                           | 2696 (8.5%)                                           | 113 (9.4%)                                | 434 (8.4%)                                    | 11547 (8.5%)        |
| August                        | 6917 (8.2%)          | 1164 (8.6%)                                           | 2534 (8.0%)                                           | 96 (8.0%)                                 | 427 (8.3%)                                    | 11138 (8.2%)        |
| September                     | 6920 (8.2%)          | 1128 (8.3%)                                           | 2536 (8.0%)                                           | 92 (7.7%)                                 | 464 (9.0%)                                    | 11140 (8.2%)        |
| October                       | 6741 (8.0%)          | 1078 (8.0%)                                           | 2465 (7.8%)                                           | 87 (7.2%)                                 | 410 (8.0%)                                    | 10781 (8.0%)        |
| November                      | 6483 (7.7%)          | 983 (7.3%)                                            | 2373 (7.5%)                                           | 91 (7.6%)                                 | 385 (7.5%)                                    | 10315 (7.6%)        |
| December                      | 6773 (8.1%)          | 1057 (7.8%)                                           | 2484 (7.8%)                                           | 80 (6.7%)                                 | 415 (8.1%)                                    | 10809 (8.0%)        |
| <b>Birth Location</b>         |                      |                                                       |                                                       |                                           |                                               |                     |
| Cluster 1                     | 39860 (47.4%)        | 6404 (47.3%)                                          | 15039 (47.5%)                                         | 556 (46.3%)                               | 2410 (46.9%)                                  | 64269 (47.4%)       |
| Cluster 2                     | 8600 (10.2%)         | 1438 (10.6%)                                          | 3225 (10.2%)                                          | 110 (9.2%)                                | 548 (10.7%)                                   | 13921 (10.3%)       |
| Cluster 3                     | 15088 (18.0%)        | 2459 (18.2%)                                          | 5477 (17.3%)                                          | 226 (18.8%)                               | 910 (17.7%)                                   | 24160 (17.8%)       |
| Cluster 4                     | 20470 (24.4%)        | 3228 (23.9%)                                          | 7911 (25.0%)                                          | 310 (25.8%)                               | 1272 (24.7%)                                  | 33191 (24.5%)       |

**Table 1.** Participant demographic details for mental health trait analysis. SD = Standard deviation. Birth location was obtained using k-means clustering (see Statistical models section for full details)

## Brain imaging measures

T1-weighted and DTI brain scans were obtained for 42,709 participants on their first imaging visit [38], with complete brain imaging data available for 37,048 participants. Participants with outlier values in global measures of cortical surface area ( $n=112$ ), mean cortical thickness ( $n=217$ ), cortical

volume ( $n=117$ ), subcortical volume ( $n=90$ ), mean diffusivity (MD) ( $n=105$ ), or fractional anisotropy (FA) ( $n=232$ ) were excluded. Global measures were derived by conducting principal component analyses (PCA) on data from the entire sample [39], and measure outliers were defined as values  $\pm 3$  standard deviations from the sample mean for that measure. Participants of non-white ethnicity ( $n=1,168$ ), non-UK/Republic of Ireland, non-specified ( $n=1,874$ ) or unrecoverable geographical ( $n=581$ ) birthplace, with a missing Townsend Deprivation Index value ( $n=26$ ), or who wished to withdraw from future studies ( $n=4$ ) were also excluded. No participants had to be removed due to head motion in the scanner. A total of 32,815 participants were included after 3,651 exclusions. Demographics of participants included in the analyses of brain imaging measures are provided in Table 2. An additional sensitivity analysis was conducted using only individuals with birth weight data ( $n=21,182$ ).

---

|                            | Total<br>(n=32815) |
|----------------------------|--------------------|
| <b>Sex</b>                 |                    |
| Female                     | 17519 (53.4%)      |
| Male                       | 15296 (46.6%)      |
| <b>Age (years)</b>         |                    |
| Mean (SD)                  | 63.7 (7.43)        |
| <b>Ethnicity</b>           |                    |
| White                      | 16 (0.0%)          |
| British                    | 31812 (96.9%)      |
| Irish                      | 578 (1.8%)         |
| Any other white background | 409 (1.2%)         |
| <b>Birth Weight (kg)</b>   |                    |
| Mean (SD)                  | 3.36 (0.614)       |
| Median [Min, Max]          | 3.37 [0.740, 6.78] |
| <b>Month of Birth</b>      |                    |
| January                    | 2731 (8.3%)        |
| February                   | 2669 (8.1%)        |
| March                      | 3018 (9.2%)        |
| April                      | 2864 (8.7%)        |
| May                        | 2873 (8.8%)        |
| June                       | 2754 (8.4%)        |
| July                       | 2802 (8.5%)        |
| August                     | 2709 (8.3%)        |
| September                  | 2673 (8.1%)        |
| October                    | 2640 (8.0%)        |
| November                   | 2445 (7.5%)        |
| December                   | 2636 (8.0%)        |
| <b>Birth Location</b>      |                    |
| Cluster 1                  | 6046 (18.4%)       |
| Cluster 2                  | 11871 (36.2%)      |
| Cluster 3                  | 2644 (8.1%)        |
| Cluster 4                  | 12254 (37.3%)      |
| <b>Scanner Site</b>        |                    |
| Cheadle                    | 20111 (61.3%)      |
| Reading                    | 3954 (12.0%)       |
| Newcastle                  | 8750 (26.7%)       |

---

**Table 2.** Participant demographic details for neuroimaging analysis. SD = Standard deviation. Birth location was obtained using k-means clustering (see Statistical models section for full details)



## **Brain morphology measures**

Brain morphometric measures were obtained by the UK Biobank with FreeSurfer 6.0 toolkit [40-42] and included volumes of seven subcortical structures for each hemisphere, as well as volume, thickness and surface area measures of 31 cortical regions for each hemisphere, based on the Desikan-Killiany-Tourville atlas [43] ( $n=32,815$ , see S1.1 Methods for full pre-analysis QC). Similar measures were analysed in Harris et al. (39) (UKB category 192) and Shen et al. (29). Global and lobar cortical thickness, surface area and cortical volume measures were derived manually for each hemisphere ( $n=32,815$ ). Lobar measures were obtained for the frontal, parietal, temporal, occipital and cingulate lobes (see S2.2.2A Methods for group composition). All brain morphometric measures were normalised.

## **White matter microstructure measures**

White matter (WM) microstructure measures consisted of FA and MD values for 12 bilateral tracts and 3 unilateral tracts derived by the UK Biobank with the FSL probabilistic tractography toolkit (See S1.1 Methods) [38, 44]. Additional fiber-related FA and MD measures were derived as the scores on the first unrotated principal components from PCA, which combined bi-hemispheric (left and right) and unilateral measures from all relevant individual fiber tracts. The three whole-brain fiber bundles derived were the association fibers, projection fibers and thalamic radiations (see Methods S2.2.2A for fiber definitions). Global FA and MD measures were derived as the scores on the first unrotated principal components from PCA analyses which combined all bi-hemispheric and unilateral tract measures. Proportions of variance explained by the first principal components are provided in Methods S2.2.2B. Thirty-eight WM integrity measures were analysed in total (19 FA and 19 MD) ( $n=32,815$ ) and all WM microstructure measures were normalised.

## Statistical models

### Mental health traits

To investigate associations between the four mental health phenotypes and seasonality, logistic binomial regression analyses were performed, covarying for sex, age, age<sup>2</sup>, Townsend Deprivation Index, assessment centre attended and place of birth location. Place of birth locations were derived with k-means clustering of participant birth north / east co-ordinates from the Ordnance Survey data (UKB variables 129 and 130), performed using “kclust” function in the R “stats” package. Twenty clustering iterations were run to identify four birth location clusters (see S2.1.1 Methods and S1-S3 Fig), and each participant was assigned to a cluster to define place of birth. Sex, assessment centre and place of birth were coded as categorical variables. A Bonferroni multiple analysis correction was applied over the four phenotypes examined ( $P < 0.0125$  ( $\alpha = 0.05 / 4$ )). Effect sizes were standardised throughout.

### Brain imaging measures

Linear regression models were applied to assess associations between seasonality and all unilateral, fiber-related or global brain measures. Mixed-effects models were applied to assess associations between seasonality and all bilateral brain measures (“nlme” package in R version 3.2.3). Sex, age, age<sup>2</sup>, Townsend Deprivation Index, assessment centre, four UKB head position covariates (X, Y, Z and table position) and place of birth cluster index (see S4-S6 Fig) were included as covariates in all analyses. Sex, assessment centre and place of birth were coded as categorical variable Hemisphere was controlled for as a random effect in the mixed-effect models for all bi-hemispheric measures (see S2.1.2 Methods). Standardised intra-cranial volume was also covaried for in all analyses of brain morphometric measures.

False Discovery Rate (FDR) correction was applied separately across individual and regional brain morphology and white matter microstructure measures per modality (Methods S2.4.1). Global measures were not corrected. A P-value threshold for significance was set to 0.05 and effect sizes were standardised throughout. All statistical analyses were performed using R (version 3.2.3). A

sensitivity analysis was conducted to reassesses the brain imaging measures for an association with seasonality after fitting birth weight as an additional fixed effect covariate.

## Results

### Seasonality associations with mental health traits

Probable recurrent Major Depressive Disorder was associated with seasonality, with a higher prevalence observed in summer births ( $\beta = 0.024$ ,  $p_{corr} = 0.048$ ). No other mental health traits were associated with seasonality (Table 3). Effect sizes are reported as log-transformed odd ratios.

| Mental Health Trait                               | Effect Size( $\beta$ ) / Log(OR) | S.E.  | p-uncorr | p-corr |
|---------------------------------------------------|----------------------------------|-------|----------|--------|
| Probable recurrent Major Depressive Disorder      | 0.024                            | 0.010 | 0.012    | 0.048  |
| Probable single Episode Major Depressive Disorder | 0.016                            | 0.013 | 0.243    | 0.973  |
| Probable Unipolar Mania                           | 0.061                            | 0.041 | 0.139    | 0.554  |
| Probable Bipolar Depression                       | 0.007                            | 0.021 | 0.754    | 1.000  |

**Table 3.** Mental health traits associated with seasonality. p-uncorr = p-uncorrected value; p-corr = Bonferroni p-corrected value; S.E = standard error.

### Seasonality associations with brain imaging measures

Greater mean temporal lobe thickness ( $\beta = 0.011$ ,  $p_{corr} = 0.017$ ) and greater mean occipital lobe thickness ( $\beta = 0.010$ ,  $p_{corr} = 0.025$ ) were associated with summer births. Summer births were also associated with four individual regional cortical thickness measures: middle temporal gyrus ( $\beta = 0.018$ ,  $p_{corr} = 0.027$ ), fusiform gyrus ( $\beta = 0.018$ ,  $p_{corr} = 0.031$ ), superior temporal gyrus ( $\beta = 0.016$ ,  $p_{corr} = 0.033$ ), and lingual gyrus ( $\beta = 0.016$ ,  $p_{corr} = 0.049$ ) (Fig 1).

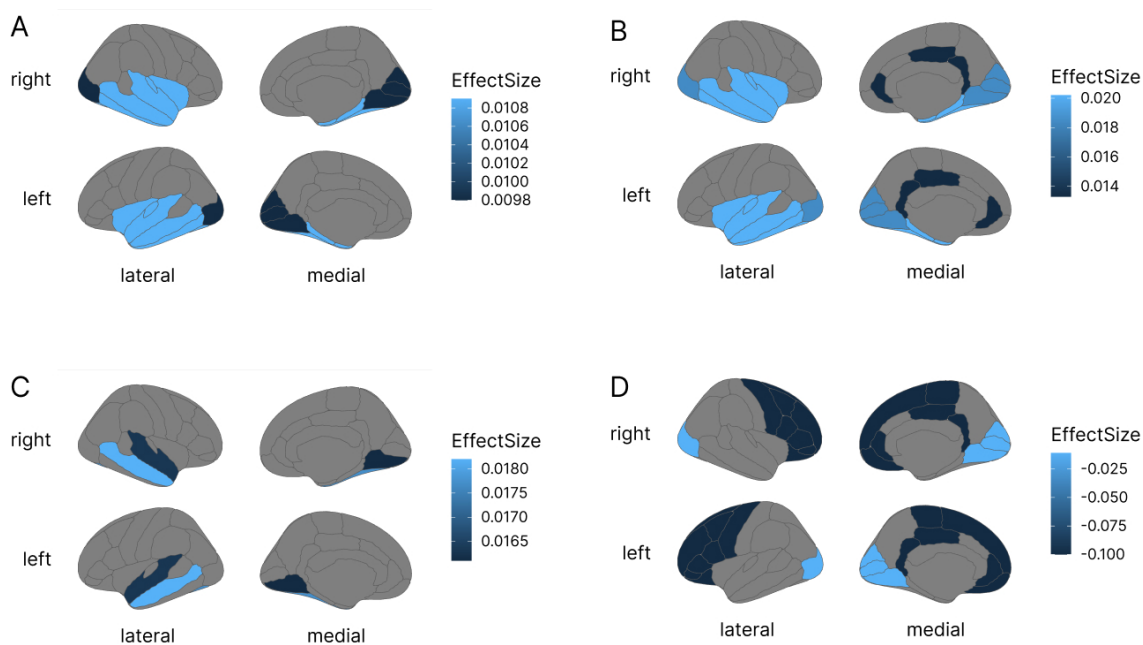

**Fig 1.** Standardised effect sizes of brain morphology measures associated with seasonality mapped onto the Desikan-Killiany-Tourville atlas for (A) mean cortical thickness of the temporal and occipital lobes in the main analyses and in the sensitivity analyses for (B) mean cortical thickness of the middle temporal, fusiform, superior temporal and lingual gyri, (C) mean cortical thickness of the temporal, occipital and cingulate lobes, and (D) cortical surface area of the frontal, occipital and cingulate lobes. Darker colour indicates associations with winter births, lighter colour indicates associations with summer births.

Winter births were associated with higher global FA ( $\beta = -0.013$ ,  $p = 0.001$ ), higher FA in the association and thalamic fibers (respectively  $\beta = -0.016$ ,  $p_{corr} = 2.63 \times 10^{-5}$  and  $\beta = -0.011$ ,  $p_{corr} = 0.004$ ), and higher FA in six of 15 individual WM tracts (effect sizes ranging from  $\beta = -0.009$  to  $\beta = -0.016$ ) (Fig 2, S3.1 Results). No MD measures were associated with seasonality.

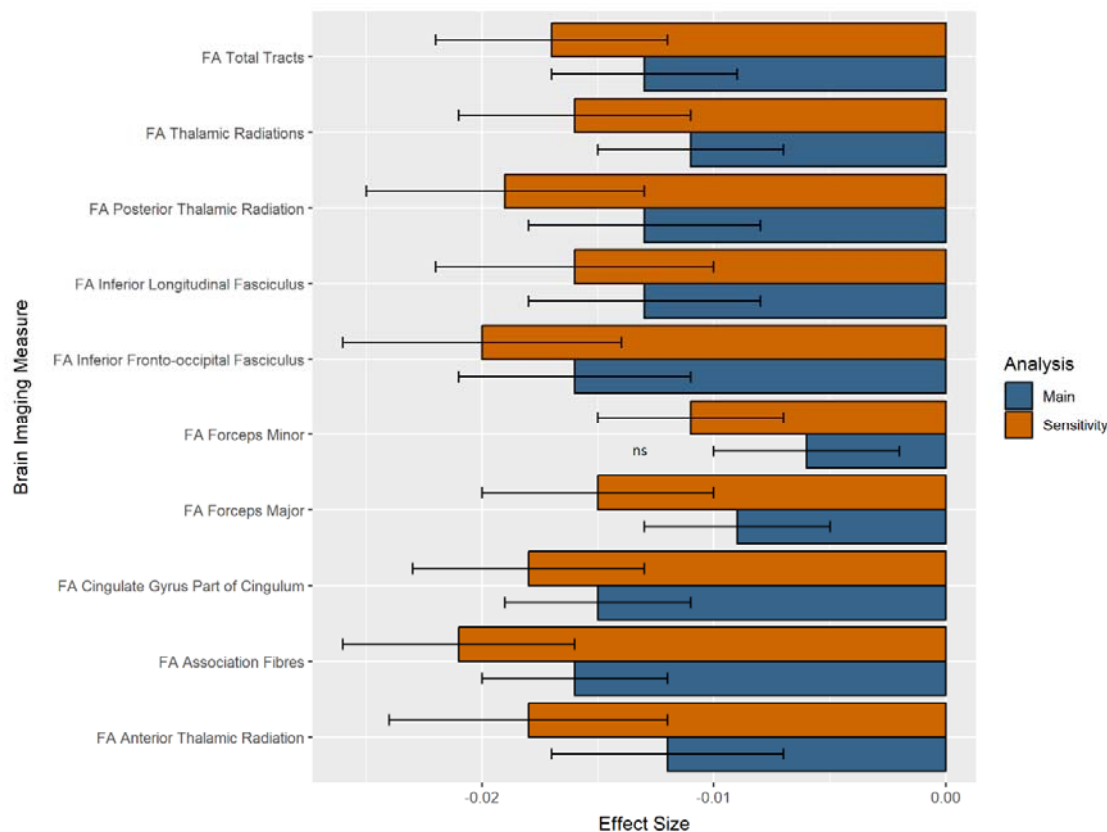

**Fig 2.** Standardised effect sizes for white matter microstructure neuroimaging measures associated with seasonality in the main and sensitivity analyses. All shown measures were associated with seasonality ( $p_{corr} < 0.05$ ), except for FA Forceps Minor in the main analysis (ns = non-significant).

When birth weight was additionally covaried for in the sensitivity analyses, four additional cortical morphometric measures were identified as significantly associated with seasonality: frontal lobe surface area ( $\beta = -0.010$ ,  $p_{corr} = 0.025$ ), occipital lobe surface area ( $\beta = -0.011$ ,  $p_{corr} = 0.025$ ), cingulate surface area ( $\beta = -0.010$ ,  $p_{corr} = 0.026$ ), and cingulate cortical thickness ( $\beta = 0.013$ ,  $p_{corr} = 0.007$ ) (Fig 1). Four previously identified associations remained significant with greater observed effect sizes (range  $\beta = 0.013$  to  $\beta = 0.020$ ) (see S3.2 Results) With regard to WM measures, an additional association of FA in the forceps minor with winter births was identified when correcting for birth weight ( $\beta = -0.011$ ,  $p_{corr} = 0.029$ ), while all previous associations remained significant with larger effect sizes (see Fig 2, S3.2.5-S3.2.7 Results for further details).

## Discussion

This study investigated associations between seasonality and mental health traits and neuroimaging measures in a large-scale cross-sectional dataset. Seasonality was associated with probable recurrent Major Depressive Disorder, as well as with a range of brain morphology and white matter microstructure brain imaging measures. Summer births were associated with a higher prevalence of probable recurrent Major Depressive Disorder, as well as greater mean thickness in the temporal, occipital and cingulate lobes, and the middle temporal, fusiform, superior temporal, and lingual gyri. Winter births were associated with more constrained water molecule diffusion and thus higher white matter integrity globally, in two white matter fiber tract bundles and in seven individual white matter tracts, as well as greater area measures in the frontal, occipital and cingulate areas. These results lend additional support to existing evidence of season of birth effects in adult health.

In this study P-RMDD was associated with summer births, aligning with northern hemisphere spring associations with MDD risk in English outpatients ( $n=16,726$ ) [6], severity in a small MDD case-control study (45 cases and 90 controls) [45] and earlier disease onset in 855 Korean MDD patients [46]. However, there exist idiosyncrasies in the seasonality phenotypes derived in these studies, which range from monthly, to two- and four-season seasonality categories per participant, making for inexact comparison. A hemispheric six-month shift has also been observed between seasonality and depression symptoms, with higher scores associating with spring births (March-May) in the Northern hemisphere and autumn births (September-November) in the Southern hemisphere, in a small young adult and adolescent cohort [47]. Although an excess of August births in MDD patients has also been observed in the Southern hemisphere within a Brazilian retrospective study of MDD cases and controls ( $n=98,457$ ) [48]. However, no associations between month of birth and depression symptoms were found in a similarly aged cohort in a recent Europe wide study ( $n=72,370$ ) [49]. For P-RMDD, therefore, our findings provide a seasonality association within a UK population sample adding another datapoint to the ambiguous literature.

Unlike P-RMDD, single episode MDD was not associated with seasonality in this study. The more than two-fold reduction in sample size for P-SEMDD ( $n=13,529$ ) may have limited statistical power to detect associations. An unshared aetiology may also be a factor, with more severe neurophysiological observations made in clinically comparable recurrent MDD cases versus single episode MDD cases [50], and an earlier age of onset and familial risk for recurrent MDD [51, 52]. Gene  $\times$  environment effects [53] and genetic variants [54, 55] associated with recurrent MDD support this distinction. Therefore, seasonality effects may vary within depressive subtypes, with a more marked effect on persistent cases in response to seasonal perinatal and natal environments. Bipolar affective disorder has been associated with January births [6] (OR=1.09, 95% CI= 1.03–1.15,  $p=0.002$ ), and for DSM-III bipolar disorder cases a seasonal pattern has been observed with significant excess births in December and a total of 5.8% seasonal excess births to expected births [56]. However, the current study did not find a seasonal association, possibly due to the inclusion of both P-RMDD and P-SEMDD within P-BD since only the former associated with seasonality. It is also possible that the self-reported phenotype used may not fully capture cases with sufficient fidelity to yield associations. UM, a relatively unexplored BD-subtype [57], had the largest effect size of the mental health traits but was not associated with seasonality potentially due to the small number of cases available. Re-examination of this phenotype in a larger UM sample is therefore warranted. In line with previous studies, we find seasonality to be associated with a cluster of white matter microstructure measures, with novel findings for brain morphology regional measures. Overall, six regional and four individual brain morphology measures were associated with seasonality, all of which were either in the area or mean thickness category, despite the lack of associations for volumetric measures and seasonality expressed as daylength in similarly powered UKB studies [16]. Thickness of the temporal lobe has been shown to be significantly reduced in schizophrenic patients [58], and the disorder's own association with winter births [59], may offer an opportunity for further study. Since cortical thickness has been less explored in the field, these associations merit closer study.

The observation of multiple negative associations for DTI FA measures in association with summer births, corroborates previous findings in which sections of the corpus callosum, the internal capsule, the corona radiata, the posterior thalamic radiation and the sagittal striatum were also found to have decreased FA values in summer compared to winter births [60], with the majority of these associations retaining significance in our sensitivity analysis. For summer births, lower FA measures, or less restricted and more isotropic diffusivity, may point to greater tissue disorganisation, itself generally accompanied by reduced axonal myelination, axonal loss, or a higher proportion of crossing fibers. Since global and regional measures yielded the strongest associations, alongside seven individual measures, seasonality may exert a non-localised effect on white matter integrity and thus warrant further analysis to specify possible mechanisms. The overall association of the thalamic radiations bundle and the association fibers bundle, composed of two and three individual tracts with individual associations respectively, provides novel evidence for lower values in summer births.

Birth seasonality effects, therefore, may independently induce penetrable changes in white matter integrity in a subset of tract bundles, an effect discernible through DTI-ascertained measures. Brain structure and connectivity measures are a promising endophenotype for mental, neurological, and physiological illness. The range of neuroimaging associations with seasonality found here offers a starting point for further probing into the mechanistic relationship between them.

This study was limited in geographical scope with the aim of keeping latitudinal and longitudinal variation minimal between subjects. Since season of birth effects have been shown to be greater at higher latitudes [59], possibly mediated by larger annual photoperiod shifts, studies in these regions, or meta-studies encompassing them might provide further insight.

Although our mental health trait phenotypes align well with DSM-5 diagnostic criteria [34], they do not reflect formal diagnoses and therefore may under- or over-extend seasonality associations present under stricter definitions. A symptom-by-symptom study could also elucidate individual



patterns in associations, such as MDD sleep aberrances and evidenced seasonality mediated sleep differences [16]. The natural patterns of distribution in birth seasonality [61] with April and May annual birth-rate peaks in UKB [16] should also be accounted for, as should the seasonal pattern in procreation habits observed in psychiatric disorders such as schizophrenia, which may be tied to heritable components [62] of mental health disorders independently. Here, birth seasonality variation was assessed comparing winter births with summer birth. However, this provides those born in spring and autumn with similar phenotypic scores and therefore will not model differences between those born in those periods. Future studies could co-model a range of seasonality phenotypes to contextualise the extent of these potential differences.

Since historically, seasonality effects on psychiatric conditions have been more pronounced in public versus private hospitals [63] and affected by urbanicity and education level, studies that account for these variables could provide a better picture of seasonality associations, although Townsend Deprivation Area may be a sufficient proxy for these measures. Generally, the lag between the time of birth and seasonality-related outcomes in later life makes their association prone to confounders which must be further considered. Overall, the small effect sizes found in this study suggest a limited role for seasonality in adult health, although usage of larger sample sizes and inclusion of more covariates could modify this.

Lastly, although our study supports an association between seasonality and adult health, identification of the mechanisms by which these effects are actualised is beyond the scope of the current study. Longitudinal studies tracking changes in mental health and neuroimaging measures would more precisely quantify within-individual shifts over the lifetime and ease the identification of key developmental periods in which these take place. Since circadian patterns of gene expression have been demonstrated to be weaker in post-mortem human subjects with MDD [64], further studies examining deficiencies in circadian rhythmicity at the transcriptomic level and their associations with mental health traits in the context of month of birth could also be beneficial. A

combinatorial approach including genetic and gene expression data would give insight into differential seasonality programming and begin to specify possible biological pathways.

In summary, we demonstrated seasonality of birth associations with adult health as measured by mental health traits and neuroimaging. The small effect sizes of our associations with global, regional, and individual brain imaging measures, as well as probable recurrent Major Depressive Disorder warrants replication in larger and more diverse datasets as well as those offering wider latitudinal ranges. A continuation of the examination of seasonality associations with mental health is also encouraged within higher powered studies or those utilising diagnosed cases.

## Acknowledgements

This research was conducted using the UK Biobank resource, application number 4844. The UK Biobank study was conducted under generic approval from the NHS National Research Ethics Service (approval letter dated June 17, 2011, Ref 11/NW/0382). All participants gave full informed written consent. We would also like to thank the UK Biobank team and all the participants for their collaboration.

## Declaration of Interest

There are no relevant declarations of interest

## Funding

M.V.R is supported under a 2018 NARSAD Young Investigator Grant from the Brain & Behavior Research Foundation (Ref: 27404). D.M.H. is supported by a Sir Henry Wellcome Postdoctoral Fellowship (Reference 213674/Z/18/Z) and a 2018 NARSAD Young Investigator Grant from the Brain & Behavior Research Foundation (Ref: 27404). STRADL UKB Application (#4844) was funded by the Wellcome Trust (Ref: 104036/Z/14/Z).

This research was funded in whole, or in part, by the Wellcome Trust [Reference 213674/Z/18/Z]. For the purpose of open access, the author has applied a CC BY public copyright licence to any Author Accepted Manuscript version arising from this submission.

The funders had no role in study design, data collection and analysis, decision to publish, or preparation of the manuscript.

## Author Contributions

M.V.R and D.M.H conceptualised the project. Data curation and software code were provided by X.S, A.S, and L.de N. The analysis was performed by M.V.R. Supervision and results interpretation were provided by H.C.W, D.M.H and D.J.S. M.V.R and D.M.H wrote the original manuscript with review and editing provided by all authors.

## References

1. Hutchins RM. Hippocratic Writings and On The Natural Faculties. Chicago: Encyclopaedia Britannica; 1952.
2. Barker DJP. The Wellcome Foundation Lecture, 1994. The fetal origins of adult disease. *Proc R Soc Lond B Biol Sci.* 1995;262(1363):37-43. doi: [doi:10.1098/rspb.1995.0173](https://doi.org/10.1098/rspb.1995.0173).
3. Langley-Evans SC, McMullen S. Developmental Origins of Adult Disease. *Med Princ Pract.* 2010;19(2):87-98. doi: [10.1159/000273066](https://doi.org/10.1159/000273066).
4. Boland MR, Shahn Z, Madigan D, Hripcsak G, Tatonetti NP. Birth month affects lifetime disease risk: a phenome-wide method. *J Am Med Inform Assoc.* 2015;22(5):1042-53. doi: [10.1093/jamia/ocv046](https://doi.org/10.1093/jamia/ocv046).
5. Disanto G, Handel AE, Para AE, Ramagopalan SV, Handunnetthi L. Season of birth and anorexia nervosa. *The British Journal of Psychiatry.* 2011;198(5):404-5. Epub 2018/01/02. doi: [10.1192/bjp.bp.110.085944](https://doi.org/10.1192/bjp.bp.110.085944).
6. Disanto G, Morahan JM, Lacey MV, DeLuca GC, Giovannoni G, Ebers GC, et al. Seasonal Distribution of Psychiatric Births in England. *PLoS One.* 2012;7(4):e34866. doi: [10.1371/journal.pone.0034866](https://doi.org/10.1371/journal.pone.0034866).
7. Escott-Price V, Smith DJ, Kendall K, Ward J, Kirov G, Owen MJ, et al. Polygenic risk for schizophrenia and season of birth within the UK Biobank cohort. *Psychological Medicine.* 2019;49(15):2499-504. Epub 2018/03/04. doi: [10.1017/S0033291718000454](https://doi.org/10.1017/S0033291718000454).
8. Lee BK, Gross R, Francis RW, Karlsson H, Schendel DE, Sourander A, et al. Birth seasonality and risk of autism spectrum disorder. *European Journal of Epidemiology.* 2019;34(8):785-92. doi: [10.1007/s10654-019-00506-5](https://doi.org/10.1007/s10654-019-00506-5).
9. Reffelmann T, Ittermann T, Empen K, Dörr M, Felix SB. Is Cardiovascular Mortality Related to the Season of Birth?: Evidence From More Than 6 Million Cardiovascular Deaths Between 1992 and 2007. *J Am Coll Cardiol.* 2011;57(7):887-8. doi: <https://doi.org/10.1016/j.jacc.2010.10.021>.
10. Joossens M, Joossens S, Van Steen K, Pierik M, Vermeire S, Rutgeerts P, et al. Crohn's Disease and Month of Birth. *Inflamm Bowel Dis.* 2005;11(6):597-9. doi: [10.1097/01.MIB.0000163697.34592.d4](https://doi.org/10.1097/01.MIB.0000163697.34592.d4).
11. Brenner AV, Linet MS, Shapiro WR, Selker RG, Fine HA, Black PM, et al. Season of birth and risk of brain tumors in adults. *Neurology.* 2004;63(2):276-81. doi: [10.1212/01.wnl.0000129984.01327.9d](https://doi.org/10.1212/01.wnl.0000129984.01327.9d). PubMed PMID: 15277620.
12. Bauer M, Glenn T, Alda M, Andreassen OA, Angelopoulos E, Ardu R, et al. Influence of light exposure during early life on the age of onset of bipolar disorder. *Journal of Psychiatric Research.* 2015;64:1-8. doi: <https://doi.org/10.1016/j.jpsychires.2015.03.013>.
13. Watson PE, McDonald BW. Seasonal variation of nutrient intake in pregnancy: effects on infant measures and possible influence on diseases related to season of birth. *Eur J Clin Nutr.* 2007;61(11):1271-80. doi: [10.1038/sj.ejcn.1602644](https://doi.org/10.1038/sj.ejcn.1602644).
14. Gilman SE, Cherkerzian S, Buka SL, Hahn J, Hornig M, Goldstein JM. Prenatal immune programming of the sex-dependent risk for major depression. *Translational Psychiatry.* 2016;6(5):e822-e. doi: [10.1038/tp.2016.91](https://doi.org/10.1038/tp.2016.91).
15. van der Leeuw C, de Witte LD, Stellinga A, van der Ley C, Bruggeman R, Kahn RS, et al. Vitamin D concentration and psychotic disorder: associations with disease status, clinical variables and urbanicity. *Psychological Medicine.* 2020;50(10):1680-6. Epub 2019/07/22. doi: [10.1017/S0033291719001739](https://doi.org/10.1017/S0033291719001739).
16. Didikoglu A, Canal MM, Pendleton N, Payton A. Seasonality and season of birth effect in the UK Biobank cohort. *Am J Hum Biol.* 2020;32(6):e23417. doi: <https://doi.org/10.1002/ajhb.23417>.
17. Lockett GA, Soto-Ramírez N, Ray MA, Everson TM, Xu CJ, Patil VK, et al. Association of season of birth with DNA methylation and allergic disease. *Allergy.* 2016;71(9):1314-24. doi: <https://doi.org/10.1111/all.12882>.

18. Green Noah H, Jackson Chad R, Iwamoto H, Tackenberg Michael C, McMahon Douglas G. Photoperiod Programs Dorsal Raphe Serotonergic Neurons and Affective Behaviors. *Curr Biol*. 2015;25(10):1389-94. doi: 10.1016/j.cub.2015.03.050.
19. van Dalum J, Melum VJ, Wood SH, Hazlerigg DG. Maternal Photoperiodic Programming: Melatonin and Seasonal Synchronization Before Birth. *Front Endocrinol (Lausanne)*. 2020;10. doi: 10.3389/fendo.2019.00901.
20. Ciarleglio CM, Axley JC, Strauss BR, Gamble KL, McMahon DG. Perinatal photoperiod imprints the circadian clock. *Nature Neuroscience*. 2011;14(1):25-7. doi: 10.1038/nn.2699.
21. Pyter LM, Nelson RJ. Enduring effects of photoperiod on affective behaviors in Siberian hamsters (*Phodopus sungorus*). *Behav Neurosci*. 2006;120:125-34. doi: 10.1037/0735-7044.120.1.125.
22. Siemann JK, Williams P, Malik TN, Jackson CR, Green NH, Emeson RB, et al. Photoperiodic effects on monoamine signaling and gene expression throughout development in the serotonin and dopamine systems. *Scientific Reports*. 2020;10(1):15437. doi: 10.1038/s41598-020-72263-5.
23. Pantazatos SP. Prediction of individual season of birth using MRI. *Neuroimage*. 2014;88:61-8. doi: <https://doi.org/10.1016/j.neuroimage.2013.11.011>.
24. Mooldijk SS, Licher S, Vinke EJ, Vernooij MW, Ikram MK, Ikram MA. Season of birth and the risk of dementia in the population-based Rotterdam Study. *European Journal of Epidemiology*. 2021;36(5):497-506. doi: 10.1007/s10654-021-00755-3.
25. Einat H, Kronfeld-Schor N, Eilam D. Sand rats see the light: Short photoperiod induces a depression-like response in a diurnal rodent. *Behavioural Brain Research*. 2006;173(1):153-7. doi: <https://doi.org/10.1016/j.bbr.2006.06.006>.
26. Ben-Hamo M, Tal K, Paz-Cohen R, Kronfeld-Schor N, Einat H. Differential effects of photoperiod length on depression- and anxiety-like behavior in female and male diurnal spiny mice. *Physiol Behav*. 2016;165:1-6. doi: <https://doi.org/10.1016/j.physbeh.2016.06.030>.
27. Bos MGN, Peters S, van de Kamp FC, Crone EA, Tamnes CK. Emerging depression in adolescence coincides with accelerated frontal cortical thinning. *Journal of Child Psychology and Psychiatry*. 2018;59(9):994-1002. doi: <https://doi.org/10.1111/jcpp.12895>.
28. Han LKM, Dinga R, Hahn T, Ching CRK, Eyer LT, Aftanas L, et al. Brain aging in major depressive disorder: results from the ENIGMA major depressive disorder working group. *Molecular Psychiatry*. 2021;26(9):5124-39. doi: 10.1038/s41380-020-0754-0.
29. Shen X, Reus LM, Cox SR, Adams MJ, Liewald DC, Bastin ME, et al. Subcortical volume and white matter integrity abnormalities in major depressive disorder: findings from UK Biobank imaging data. *Scientific Reports*. 2017;7(1):5547. doi: 10.1038/s41598-017-05507-6.
30. Bos MGN, Wierenga LM, Blankenstein NE, Schreuders E, Tamnes CK, Crone EA. Longitudinal structural brain development and externalizing behavior in adolescence. *Journal of Child Psychology and Psychiatry*. 2018;59(10):1061-72. doi: <https://doi.org/10.1111/jcpp.12972>.
31. Wise T, Radua J, Via E, Cardoner N, Abe O, Adams TM, et al. Common and distinct patterns of grey-matter volume alteration in major depression and bipolar disorder: evidence from voxel-based meta-analysis. *Molecular Psychiatry*. 2017;22(10):1455-63. doi: 10.1038/mp.2016.72.
32. Mancini V, Sandini C, Padula MC, Zöller D, Schneider M, Schaer M, et al. Positive psychotic symptoms are associated with divergent developmental trajectories of hippocampal volume during late adolescence in patients with 22q11DS. *Molecular Psychiatry*. 2020;25(11):2844-59. doi: 10.1038/s41380-019-0443-z.
33. Bycroft C, Freeman C, Petkova D, Band G, Elliott LT, Sharp K, et al. The UK Biobank resource with deep phenotyping and genomic data. *Nature*. 2018;562(7726):203-9. doi: 10.1038/s41586-018-0579-z.
34. Davis KAS, Coleman JRI, Adams M, Allen N, Breen G, Cullen B, et al. Mental health in UK Biobank – development, implementation and results from an online questionnaire completed by 157 366 participants: a reanalysis. *BJPsych Open*. 2020;6(2):e18. Epub 02/06. doi: 10.1192/bjo.2019.100.

35. Howard DM, Pain O, Arathimos R, Barbu MC, Amador C, Walker RM, et al. Methylome-wide association study of early life stressors and adult mental health. *Human Molecular Genetics*. 2021;31(4):651-64. doi: 10.1093/hmg/ddab274.
36. Smith DJ, Nicholl BI, Cullen B, Martin D, Ul-Haq Z, Evans J, et al. Prevalence and characteristics of probable major depression and bipolar disorder within UK Biobank: cross-sectional study of 172,751 participants. *PLoS One*. 2013;8(11):e75362.
37. Sangha N, Lyall L, Wyse C, Cullen B, Whalley HC, Smith DJ. The nosological status of unipolar mania and hypomania within UK Biobank according to objective and subjective measures of diurnal rest and activity. *Bipolar Disorders*. 2022;24(7):726-38. doi: <https://doi.org/10.1111/bdi.13237>.
38. Miller KL, Alfaro-Almagro F, Bangerter NK, Thomas DL, Yacoub E, Xu J, et al. Multimodal population brain imaging in the UK Biobank prospective epidemiological study. *Nature Neuroscience*. 2016;19(11):1523-36. doi: 10.1038/nn.4393.
39. Harris MA, Cox SR, de Nooij L, Barbu MC, Adams MJ, Shen X, et al. Structural neuroimaging measures and lifetime depression across levels of phenotyping in UK biobank. *Translational Psychiatry*. 2022;12(1):157. doi: 10.1038/s41398-022-01926-w.
40. Dale AM, Fischl B, Sereno MI. Cortical Surface-Based Analysis: I. Segmentation and Surface Reconstruction. *Neuroimage*. 1999;9(2):179-94. doi: <https://doi.org/10.1006/nimg.1998.0395>.
41. Fischl B, Sereno MI, Dale AM. Cortical Surface-Based Analysis: II: Inflation, Flattening, and a Surface-Based Coordinate System. *Neuroimage*. 1999;9(2):195-207. doi: <https://doi.org/10.1006/nimg.1998.0396>.
42. Fischl B, van der Kouwe A, Destrieux C, Halgren E, Ségonne F, Salat DH, et al. Automatically Parcellating the Human Cerebral Cortex. *Cereb Cortex*. 2004;14(1):11-22. doi: 10.1093/cercor/bhg087.
43. Alexander B, Loh WY, Matthews LG, Murray AL, Adamson C, Beare R, et al. Desikan-Killiany-Tourville Atlas Compatible Version of M-CRIB Neonatal Parcellated Whole Brain Atlas: The M-CRIB 2.0. *Front Neurosci*. 2019;13. doi: 10.3389/fnins.2019.00034.
44. Alfaro-Almagro F, Jenkinson M, Bangerter NK, Andersson JLR, Griffanti L, Douaud G, et al. Image processing and Quality Control for the first 10,000 brain imaging datasets from UK Biobank. *Neuroimage*. 2018;166:400-24. doi: <https://doi.org/10.1016/j.neuroimage.2017.10.034>.
45. Fountoulakis KN, Iacovides A, Karamouzis M, Kaprinis GS, Ierodiakonou C. Season of birth, clinical manifestations and Dexamethasone Suppression Test in unipolar major depression. *Annals of General Psychiatry*. 2007;6(1):20. doi: 10.1186/1744-859X-6-20.
46. Park S-C, Sakong J-K, Koo BH, Kim J-M, Jun T-Y, Lee M-S, et al. Potential Relationship between Season of Birth and Clinical Characteristics in Major Depressive Disorder in Koreans: Results from the CRESCEND Study. *Yonsei Med J*. 2016;57(3):784-9.
47. Joiner TE, Pfaff JJ, Acres JG, Johnson F. Birth month and suicidal and depressive symptoms in Australians born in the Southern vs. the Northern hemisphere. *Psychiatry Research*. 2002;112(1):89-92. doi: [https://doi.org/10.1016/S0165-1781\(02\)00183-X](https://doi.org/10.1016/S0165-1781(02)00183-X).
48. Ferreira Frederico R, de Paula Gustavo C, de Carvalho Ricardo JV, Ribeiro-Barbosa Erika R, Spini Vanessa BMG. Impact of Season of Birth on Psychiatric Disorder Susceptibility and Drug Abuse Incidence in a Population from the Köppen Tropical Savanna Region of Brazil. *Neuropsychobiology*. 2019;79(2):131-40. doi: 10.1159/000503069.
49. Csajbók Z, Kagstrom A, Cermakova P. Season of birth has no effect on symptoms of depression and anxiety in older adults. *Scientific Reports*. 2022;12(1):6823. doi: 10.1038/s41598-022-10892-8.
50. Jindal RD, Thase ME, Fasiczka AL, Friedman ES, Buysse DJ, Frank E, et al. Electroencephalographic sleep profiles in single-episode and recurrent unipolar forms of major depression: II. comparison during remission. *Biological Psychiatry*. 2002;51(3):230-6. doi: 10.1016/S0006-3223(01)01226-4.
51. Weissman MM, Wickramaratne P. Age of onset and familial risk in major depression. *Arch Gen Psychiatry*. 2000;57(5):513-4. doi: 10.1001/archpsyc.57.5.513. PubMed PMID: 10807494.

52. Kendler KS, Thornton LM, Gardner CO. Stressful Life Events and Previous Episodes in the Etiology of Major Depression in Women: An Evaluation of the “Kindling” Hypothesis. *American Journal of Psychiatry*. 2000;157(8):1243-51. doi: 10.1176/appi.ajp.157.8.1243.
53. Uher R, Caspi A, Houts R, Sugden K, Williams B, Poulton R, et al. Serotonin transporter gene moderates childhood maltreatment's effects on persistent but not single-episode depression: Replications and implications for resolving inconsistent results. *Journal of Affective Disorders*. 2011;135(1):56-65. doi: <https://doi.org/10.1016/j.jad.2011.03.010>.
54. Lewis CM, Ng MY, Butler AW, Cohen-Woods S, Uher R, Pirlo K, et al. Genome-Wide Association Study of Major Recurrent Depression in the U.K. Population. *American Journal of Psychiatry*. 2010;167(8):949-57. doi: 10.1176/appi.ajp.2010.09091380.
55. Shi J, Potash JB, Knowles JA, Weissman MM, Coryell W, Scheftner WA, et al. Genome-wide association study of recurrent early-onset major depressive disorder. *Molecular Psychiatry*. 2011;16(2):193-201. doi: 10.1038/mp.2009.124.
56. Fuller Torrey E, Rawlings RR, Ennis JM, Merrill DD, Flores DS. Birth seasonality in bipolar disorder, schizophrenia, schizoaffective disorder and stillbirths. *Schizophrenia Research*. 1996;21(3):141-9. doi: [https://doi.org/10.1016/0920-9964\(96\)00022-9](https://doi.org/10.1016/0920-9964(96)00022-9).
57. Stokes PRA, Yalin N, Mantingh T, Colasanti A, Patel R, Bellivier F, et al. Unipolar mania: Identification and characterisation of cases in France and the United Kingdom. *Journal of Affective Disorders*. 2020;263:228-35. doi: <https://doi.org/10.1016/j.jad.2019.11.024>.
58. Rimol LM, Hartberg CB, Nesvåg R, Fennema-Notestine C, Hagler DJ, Jr., Pung CJ, et al. Cortical Thickness and Subcortical Volumes in Schizophrenia and Bipolar Disorder. *Biological Psychiatry*. 2010;68(1):41-50. doi: 10.1016/j.biopsych.2010.03.036.
59. Davies G, Welham J, Chant D, Torrey EF, McGrath J. A Systematic Review and Meta-analysis of Northern Hemisphere Season of Birth Studies in Schizophrenia. *Schizophrenia Bulletin*. 2003;29(3):587-93. doi: 10.1093/oxfordjournals.schbul.a007030.
60. Giezendanner S, Walther S, Razavi N, Van Swam C, Fisler MS, Soravia LM, et al. Alterations of White Matter Integrity Related to the Season of Birth in Schizophrenia: A DTI Study. *PLoS One*. 2013;8(9):e75508. doi: 10.1371/journal.pone.0075508.
61. Martinez-Bakker M, Bakker KM, King AA, Rohani P. Human birth seasonality: latitudinal gradient and interplay with childhood disease dynamics. *Proceedings of the Royal Society B: Biological Sciences*. 2014;281(1783):20132438. doi: 10.1098/rspb.2013.2438.
62. Bleuler M. Letter to the Editor: Seasonality of Birth of Future Schizophrenics and Seasonality of Depressive Episodes. *Schizophrenia Bulletin*. 1991;17(2):191-2. doi: 10.1093/schbul/17.2.191.
63. Barry H, Barry H. Season of Birth in Schizophrenics: Its Relation to Social Class. *Archives of General Psychiatry*. 1964;11(4):385-91. doi: 10.1001/archpsyc.1964.01720280031005.
64. Li JZ, Bunney BG, Meng F, Hagenauer MH, Walsh DM, Vawter MP, et al. Circadian patterns of gene expression in the human brain and disruption in major depressive disorder. *Proceedings of the National Academy of Sciences*. 2013;110(24):9950-5. doi: 10.1073/pnas.1305814110.

# Supporting Information

## Supplementary Methods

### S1. UKB Data procedures and acquisition

- S1.1 Brain imaging measures

### S2. Data pre-processing

#### S2.1 Covariates

- S2.1.1 Mental health traits
- S2.1.2 Brain imaging measures

#### S2.2 Classification

- S2.2.1 Mental health traits
  - S2.2.1A Variables utilised to derive probable mania mental health phenotypes
  - S2.2.1B Variables utilised to derive probable depression mental health phenotypes
  - S2.2.1C Criteria for mental health trait phenotype grouping
  - S2.2.1D Overlaps in mental health phenotype groupings
- S2.2.2 Brain imaging measures
  - S2.2.2A UKB T1 and DTI brain imaging variables used to derive brain imaging measures
  - S2.2.2B Variance explained by the first principal component for DTI PCA

#### S2.3 Quality control

- S2.3.1 Mental health traits
  - S2.3.1A Conditions excluded for mental health traits
  - S2.3.1B Sample size per mental health traits post-exclusions

#### S2.4 Multiple testing correction

- S2.4.1 Multiple testing corrections applied per neuroimaging measure modality

## Supplementary Results

### S3. Brain imaging measures supplementary results

- S3.1 Seasonality associations with brain imaging measures
  - S3.1.1 Global T1 measures
  - S3.1.2 Lobar T1 measures
  - S3.1.3 Individual T1 measures
  - S3.1.4 Subcortical Measures
  - S3.1.5 DTI Global Measures
  - S3.1.6 DTI Grouped Tract Measures
  - S3.1.7 DTI Individual Tract Measures
- S3.2 Seasonality associations with brain imaging measures covarying for birth weight
  - S3.2.1 Global T1 measures
  - S3.2.2 Lobar T1 measures
  - S3.2.3 Individual T1 measures
  - S3.2.4 Subcortical Measures
  - S3.2.5 DTI Global Measures
  - S3.2.6 DTI Grouped Tract Measures
  - S3.2.7 DTI Individual Tract Measures



## Supplementary Figures

S1 Fig. Visualisation of a maximum of 12 clusters for birth location via k-means clustering analysis on UKB datafields 129 and 130 for participants who had completed the MHQ and/or mania and depression questions in the touchscreen questionnaire.

S2 Fig. Elbow chart of the total within sum of squares by number of clusters (max N=12) for kmeans clustering performed on UKB datafields 129 and 130 for participants who had completed the MHQ and/or mania and depression questions in the touchscreen questionnaire.

S3 Fig. Visualisation of the final four clusters chosen to be the proxy for birth location via k-means clustering analysis on UKB datafields 129 and 130 for participants who had completed the MHQ and/or mania and depression questions in the touchscreen questionnaire.

S4 Fig. Visualisation of a maximum of 12 clusters for birth location via k-means clustering analysis on UKB datafields 129 and 130 for participants who had attended UKB's imaging assessment.

S5 Fig. Elbow chart of the total within sum of squares by number of clusters (max N=12) for kmeans clustering performed on UKB datafields 129 and 130 for participants who had attended UKB's imaging assessment.

S6 Fig. Visualisation of the final four clusters chosen to be the proxy for birth location via k-means clustering analysis on UKB datafields 129 and 130 for participants who had attended UKB's imaging assessment.
